# Supplementary material
Source: bioRxiv or medRxiv preprint supplement (https://medrxiv.org/highwire/filestream/78789/field_highwire_adjunct_files/0/2020.04.27.20082206-1.pdf)
Supplement: Supplementary file [file 2020.04.27.20082206-1.pdf]

| chromoso | start pos | end pos  | reference | observed | zygosity | refGene fu  | refGene g | refGene in |
|----------|-----------|----------|-----------|----------|----------|-------------|-----------|------------|
| chr21    | 42540380  | 42540380 | C         | G        | het      | exonic      | BACE2     | BACE2:NM   |
| chr21    | 42540382  | 42540382 | G         | C        | het      | exonic      | BACE2     | BACE2:NM   |
| chr21    | 42540406  | 42540406 | G         | -        | hom      | exonic      | BACE2     | BACE2:NM   |
| chr21    | 42609493  | 42609493 | G         | A        | het      | exonic      | BACE2     | BACE2:NM   |
| chr21    | 42609792  | 42609792 | T         | G        | het      | intronic    | BACE2     |            |
| chr21    | 42613741  | 42613741 | C         | T        | het      | splicing    | BACE2     | NM_0121C   |
| chr21    | 42615289  | 42615289 | -         | T        | hom      | splicing    | BACE2     | NM_0121C   |
| chr21    | 42615293  | 42615293 | C         | T        | het      | splicing    | BACE2     | NM_0121C   |
| chr21    | 42622657  | 42622657 | G         | C        | hom      | intronic    | BACE2     |            |
| chr21    | 42622786  | 42622786 | C         | T        | hom      | exonic      | BACE2     | BACE2:NM   |
| chr21    | 42622865  | 42622866 | TG        | GA       | hom      | intronic    | BACE2     |            |
| chr21    | 42629075  | 42629075 | C         | T        | het      | splicing    | BACE2     | NM_0121C   |
| chr21    | 42647300  | 42647300 | A         | T        | het      | exonic;spli | BACE2;BA  | BACE2:NM   |
| chrX     | 15582130  | 15582131 | TA        | AG       | het      | splicing    | ACE2      | NM_0218C   |
| chrX     | 15582129  | 15582130 | CT        | GG       | het      | splicing    | ACE2      | NM_0218C   |
| chrX     | 15582129  | 15582130 | CT        | GG       | hom      | splicing    | ACE2      | NM_0218C   |
| chrX     | 15584420  | 15584420 | A         | G        | hom      | exonic      | ACE2      | ACE2:NM    |
| chrX     | 15584529  | 15584529 | A         | C        | het      | intronic    | ACE2      |            |
| chrX     | 15585851  | 15585851 | A         | -        | het      | exonic;spli | ACE2;ACE2 | ACE2:NM    |
| chrX     | 15596143  | 15596143 | -         | ATAAG    | hom      | intronic    | ACE2      |            |
| chrX     | 15610348  | 15610348 | C         | T        | hom      | splicing    | ACE2      | NM_0218C   |

| refGene exonic function | dbSNP/av    | NHLBI ESP | ExAC_ALL | ExAC_Inbr | ExAC_AFR | ExAC_AMI | ExAC_EAS | ExAC_FIN |
|-------------------------|-------------|-----------|----------|-----------|----------|----------|----------|----------|
| nonsynonymous SNV       |             |           |          |           |          |          |          |          |
| synonymous SNV          |             |           |          |           |          |          |          |          |
| frameshift deletion     |             |           |          |           |          |          |          |          |
| nonsynonymous SNV       |             |           |          |           |          |          |          |          |
|                         | rs9975170   |           |          |           |          |          |          |          |
| 5:exon4:c.619-5C>T      | rs2021660   | 0.0002    | 0        | 0.0022    | 0.0004   | 0        | 0        | 0        |
| 5:exon5:c.748-14->T     |             |           |          |           |          |          |          |          |
| 5:exon5:c.748-10C>T     | rs2252576   | 0.4037    | 0.2523   | 0.1296    | 0.7265   | 0.1235   | 0.0662   | 0.1938   |
|                         | rs960231    | 0.7108    | 0.7155   | 0.062     | 0.8305   | 0.8588   | 0.9276   | 0.5718   |
| synonymous SNV          | rs1046210   | 0.3013    | 0.439    | 0.0772    | 0.1197   | 0.6392   | 0.6992   | 0.4044   |
|                         |             |           |          |           |          |          |          |          |
| 5:exon8:c.1135-10C>T    | rs7336832   | 0.0238    | 0.0079   | 0.0632    | 0.0821   | 0.0065   | 0        | 0        |
| nonsynonymous SNV       | rs755085838 |           | 0        | 0         | 0        | 0        | 0        | 0        |
| 4:exon18:r.spl          |             |           |          |           |          |          |          |          |
| 4:exon18:r.spl          |             |           |          |           |          |          |          |          |
| 4:exon18:r.spl          |             |           |          |           |          |          |          |          |
| synonymous SNV          | rs4646179   | 0.0226    | 0.0071   | 0.4313    | 0.0651   | 0.0033   | 0        | 0        |
|                         |             |           |          |           |          |          |          |          |
| frameshift deletion     |             |           |          |           |          |          |          |          |
|                         | rs113691336 |           |          |           |          |          |          |          |
| 4:exon4:c.439+4G>A      | rs2285666   | 0.2138    | 0.285    | 0.5807    | 0.2143   | 0.3999   | 0.5479   | 0.2013   |

| ExAC_NFE | ExAC_OTH | ExAC_SAS | ExAC_MAI | ExAC_FEMALE |
|----------|----------|----------|----------|-------------|
|          |          |          |          |             |
|          |          |          |          |             |
|          |          |          |          |             |
|          |          |          |          |             |
| 0        | 0        | 0.0001   | 0        | 0.0001      |
|          |          |          |          |             |
| 0.24     | 0.2151   | 0.214    | 0.2414   | 0.2655      |
| 0.6384   | 0.696    | 0.8008   | 0.7129   | 0.7186      |
| 0.3958   | 0.467    | 0.5514   | 0.4486   | 0.4272      |
|          |          |          |          |             |
| 0.0005   | 0.0033   | 0        | 0.0053   | 0.0112      |
| 0        | 0        | 0        | 0        | 0           |
|          |          |          |          |             |
|          |          |          |          |             |
|          |          |          |          |             |
| 0.0007   | 0.0032   | 0.0003   | 0.0044   | 0.0088      |
|          |          |          |          |             |
|          |          |          |          |             |
|          |          |          |          |             |
| 0.2073   | 0.2741   | 0.4994   | 0.2911   | 0.281       |
